# Supplementary material for: Bile acids regulate hepatic gluconeogenic genes and farnesoid X receptor via Gαi-protein-coupled receptors and the AKT pathway
Source: PubMed Central journal article supplement — J Lipid Res. 2010 Aug;51(8):2234–44. doi: 10.1194/jlr.M004929 (PMC2903791; doi:10.1194/jlr.m004929), 2010-08

## FIGURE LEGENDS FOR ONLINE DATA

**Fig. 1. Taurocholate rapidly activates Fox01 in the chronic bile fistula rat.**

Bile fistulas were placed in rats and bile drained for 48 h after surgery as previously described (20,29). Vehicle (PBS) or taurocholate was infused intraduodenally at a rate of 1.05 ml/h/100g rat and a concentration of 36  $\mu\text{mol/h/100 g}$  rat. Animals were harvested at times indicated and liver pieces from each animal isolated and snap-frozen. A piece of liver from each animal was thawed and homogenized in lysis buffer and phosphorylation of Fox01 determined by Western blot as previously described (16). Actin was used as the loading control. Representative blot shown. (N = 4).

**Fig. 2. Effect of siRNA on PKC $\zeta$  protein levels.** Lentivirus encoding siRNA for PKC $\zeta$  was added to primary hepatocytes in a minimal volume for 3 hours, media were brought to normal volume, and cells incubated for 20 hours. Cells were then treated with TCA for a 3 hour time course, harvested as cell lysates for Western blot analysis using actin as the loading control.

## Figure 1 Supplemental Data

Western of pFOX01 in Bile Fistula Rats  
Infused with TCA

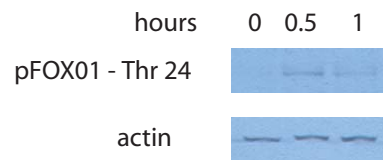

## Figure 2 Supplemental Data

### Western of PKCzeta siRNA Effect

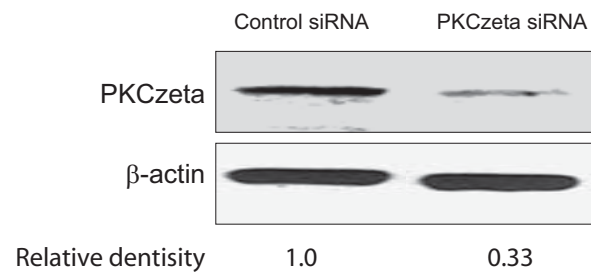

Supplement: supp_M004929_jlr.M004929-1.pdf [file supp_M004929_jlr.M004929-1.pdf]
